# Supplementary material for: Exploratory and inferential analysis of gene cluster neighborhood graphs
Source: Springer Nature journal article supplement (doi:10.1186/1471-2105-10-288), 2009-09-14

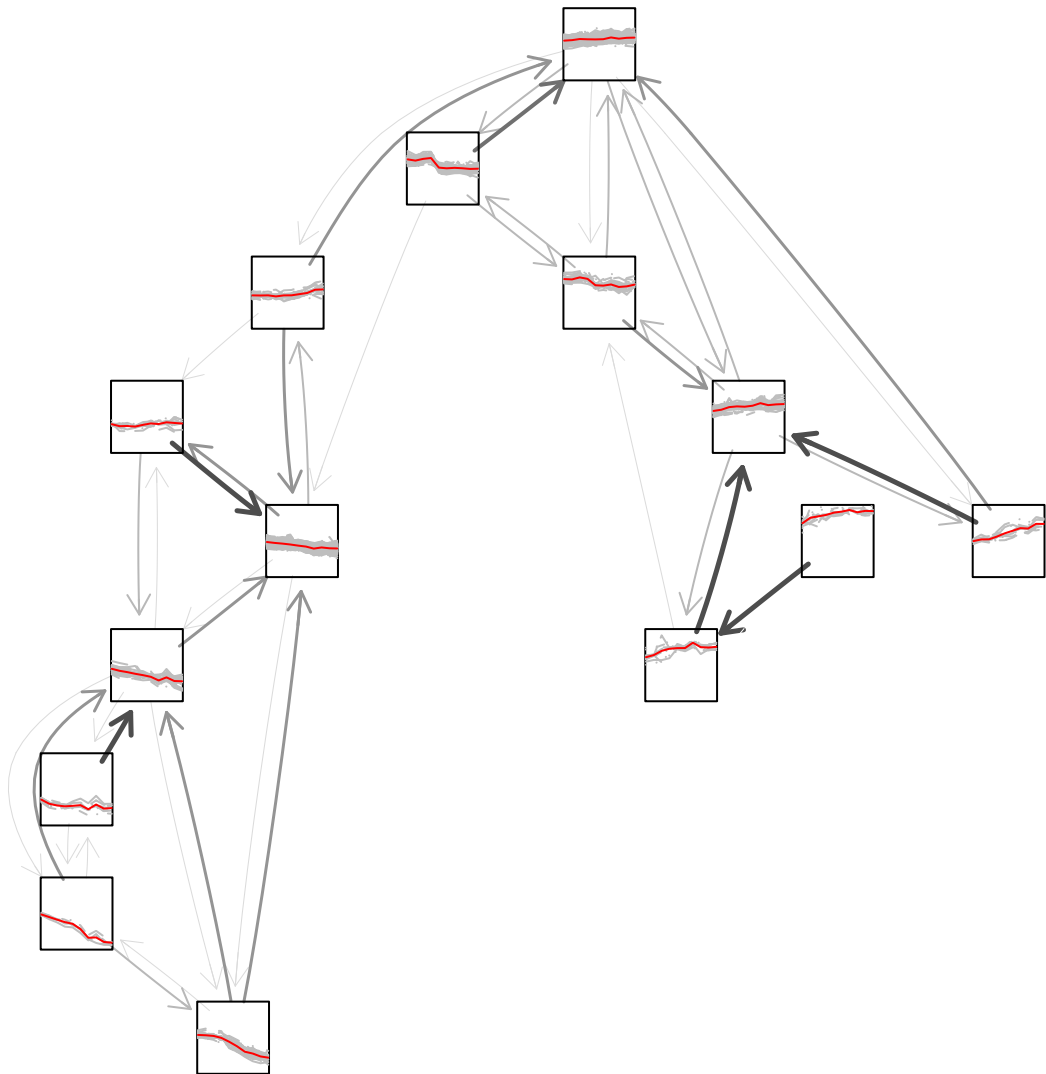

Supplement: 12859_2009_3018_MOESM5_ESM.pdf [file 12859_2009_3018_MOESM5_ESM.pdf]
